# Supplementary material for: Bispectral Index–Derived EEG Metrics for Objective Perioperative Pain Assessment in Non‑Communicative Patients
Source: Research Square preprint supplement (doi:10.21203/rs.3.rs-7774838/v1), 2025-11-05
Supplement: Supplementary file 1 [file 49e127fe95ec2586ea86a881.xlsx]

## Sheet: Sheet1
ID number	GROUP	AGE	WEIGHT	HEIGHT	GENDER	SPMSQ	MEASUREMENT	TIMEPOINT	NRS	PAINAD	SEF08	MEDFRQ	TOTPOW08
FILE L02061229	PZT-CI	85	75	170	1	1	R1	PRE-ANESTHESIA	1	5	27.55	13.73	60.06
FILE L02061229	PZT-CI	85	75	170	1	1	R2	ANESTHESIA	4	1	27.01	13.73	63.57
FILE L02061229	PZT-CI	85	75	170	1	1	R3	POST-ANESTHESIA	2	0	26.65	11.9	62.62
FILE L02071544	PZT-NC	77	70	160	2	0	R1	PRE-ANESTHESIA	0	0	14.08	3.4	64.46
FILE L02071544	PZT-NC	77	70	160	2	0	R2	ANESTHESIA	8	8	21.74	7.79	65.32
FILE L02071544	PZT-NC	77	70	160	2	0	R3	POST-ANESTHESIA	3	3	16.01	3.52	68.28
FILE L02071544	PZT-NC	77	70	160	2	0	R4	POST-ANESTHESIA	0	0	10.06	2.03	72.75
FILE L02071544	PZT-CI	89	86	170	2	2	R1	PRE-ANESTHESIA	NV	2	11.95	3.66	64.99
FILE L02071544	PZT-CI	89	86	170	2	2	R2	ANESTHESIA	NV	5	22.5	7.08	68.67
FILE L02071544	PZT-CI	89	86	170	2	2	R3	POST-ANESTHESIA	NV	3	24.12	5.35	67.19
FILE L02071544	PZT-CI	89	86	170	2	2	R4	POST-ANESTHESIA	NV	0	14.82	3.46	64.85
FILE L03081307	PZT-CI	100	60	155	2	1	R1	PRE-ANESTHESIA	7	2	27.99	13.83	64.18
FILE L03081307	PZT-CI	100	60	155	2	1	R2	POST-ANESTHESIA	0	0	26.4	10.4	63.1
FILE L03211322	PZT-NC	77	72	160	2	0	R1	PRE-ANESTHESIA	8	0	20.97	5.22	64.07
FILE L03211322	PZT-NC	77	72	160	2	0	R2	POST-ANESTHESIA	1	0	21.81	5.26	63.1
FILE L04271737	PZT-CI	70	78	175	2	2	R1	PRE-ANESTHESIA	NV	0	25.09	7.4	66.08	GA
FILE L04271737	PZT-CI	70	78	175	2	2	R2	POST-ANESTHESIA	NV	6	28.01	16.32	68.34
FILE L0701011158	PZT-NC	89	70	155	2	0	R1	PRE-ANESTHESIA	0	0	18.87	5.37	65.8
FILE L0701011158	PZT-NC	89	70	155	2	0	R2	PRE-ANESTHESIA	0	0	18.68	5.29	65.2
FILE L0701011158	PZT-NC	89	70	155	2	0	R3	ANESTHESIA	8	8	24.88	8.06	65.6
FILE L0701011158	PZT-NC	89	70	155	2	0	R4	POST-ANESTHESIA	0	0	18.19	4.86	65.28
FILE L08221022	PZT-CI	82	65	156	2	1	R1	PRE-ANESTHESIA	0	0	21.47	4.82	65.02
FILE L08221022	PZT-CI	82	65	156	2	1	R2	ANESTHESIA	5	5	18.81	4.49	67.77
FILE L08221022	PZT-CI	82	65	156	2	1	R3	POST-ANESTHESIA	0	0	21.81	7.97	67.14
FILE L08271127	PZT-CI	99	35	155	2	2	R1	PRE-ANESTHESIA	0	1	13.13	3.52	62.08
FILE L08271127	PZT-CI	99	35	155	2	2	R2	POST-ANESTHESIA	0	0	13.92	2.76	62.44
FILE L011051203	PZT-CI	90	50	155	2	1	R1	PRE-ANESTHESIA	0	0	17.62	4.88	70.98
FILE L011051203	PZT-CI	90	50	155	2	1	R2	ANESTHESIA	3	3	22.64	7.29	69.61
FILE L011051203	PZT-CI	90	50	155	2	1	R3	POST-ANESTHESIA	0	0	14.64	3.48	69.52
FILE L10301357	PZT-CI	88	60	155	2	1	R1	PRE-ANESTHESIA	0	2	14.27	3.32	65.8
FILE L10301357	PZT-CI	88	60	155	2	1	R2	ANESTHESIA	0	2	16.04	3.69	61.44
FILE L10301357	PZT-CI	88	60	155	2	1	R3	POST-ANESTHESIA	0	0	18.24	5.52	56.01
FILE L11021049	PZT-CI	86	50	155	2	1	R1	PRE-ANESTHESIA	3	3	19.67	6.27	66.72
FILE L11021049	PZT-CI	86	50	155	2	1	R2	ANESTHESIA	3	3	16.45	5.07	66.81
FILE L11021049	PZT-CI	86	50	155	2	1	R3	POST-ANESTHESIA	0	0	18.13	6.59	62.92
FILE L11021339	PZT-NC	78	70	176	1	0	R1	PRE-ANESTHESIA	1	1	16.54	3.78	69.22
FILE L11021339	PZT-NC	78	70	176	1	0	R2	POST-ANESTHESIA	0	0	18.97	5.31	66.27
FILE L1119115	PZT-CI	87	45	165	2	1	R1	PRE-ANESTHESIA	NV	0	22.89	5.06	67.18
FILE L1119115	PZT-CI	87	45	165	2	1	R2	POST-ANESTHESIA	NV	0	24.46	4.25	66.51
FILE L12271152	PZT-NC	77	72	160	2	0	R1	PRE-ANESTHESIA	3	2	15.41	3.2	66.08
FILE L12271152	PZT-NC	77	72	160	2	0	R2	ANESTHESIA	8	6	17.03	4.08	65.2
FILE L12271152	PZT-NC	77	72	160	2	0	R3	POST-ANESTHESIA	3	0	14.45	3.08	66.04
FILE L12271152	PZT-NC	70	80	180	2	0	R1	PRE-ANESTHESIA	2	0	16.64	3.19	69.02
FILE L12271152	PZT-NC	70	80	180	2	0	R2	POST-ANESTHESIA	0	0	15.26	4.99	70.98
FILE L01091045	PZT-NC	85	50	158	2	0	R1	PRE-ANESTHESIA	5	5	22.88	7.23	68
FILE L01091045	PZT-NC	85	50	158	2	0	R2	ANESTHESIA	4	4	20.69	4.37	65.39
FILE L01091045	PZT-NC	85	50	158	2	0	R3	POST-ANESTHESIA	0	0	16.91	4.74	69.51
FILE L01141258	PZT-NC	70	48	160	2	0	R1	PRE-ANESTHESIA	8	1	22.4	4.83	63.82
FILE L01141258	PZT-NC	70	48	160	2	0	R2	ANESTHESIA	7	2	21.22	4.9	65.24
FILE L01141258	PZT-NC	70	48	160	2	0	R3	POST-ANESTHESIA	4	0	20.05	5.51	71.02
FILE L012221454	PZT-CI	87	45	150	2	1	R1	PRE-ANESTHESIA	NV	0	14.88	3.54	73.22	GA
FILE L012221454	PZT-CI	87	45	150	2	1	R2	POST-ANESTHESIA	NV	6	20.78	5.63	63.41
FILE L02040925	PZT-CI	91	65	160	2	1	R1	PRE-ANESTHESIA	0	0	16.19	4.22	66.09
FILE L02040925	PZT-CI	91	65	160	2	1	R2	PRE-ANESTHESIA	0	0	16.44	3.82	65.6
FILE L02040925	PZT-CI	91	65	160	2	1	R3	ANESTHESIA	10	10	24.22	6.56	63.61
FILE L02040925	PZT-CI	91	65	160	2	1	R4	POST-ANESTHESIA	0	0	25.08	7.96	59.85
FILE L02071124	PZT-CI	85	60	160	2	1	R1	PRE-ANESTHESIA	5	2	17.16	3.78	65.28
FILE L02071124	PZT-CI	85	60	160	2	1	R2	POST-ANESTHESIA	0	0	15.24	3.47	66.11
FILE L0211344	PZT-NC	85	80	170	2	0	R1	PRE-ANESTHESIA	3	0	21.15	6.58	65.22
FILE L0211344	PZT-NC	85	80	170	2	0	R2	PRE-ANESTHESIA	0	0	22.29	6.1	63.58
FILE L0211344	PZT-NC	85	80	170	2	0	R3	ANESTHESIA	8	8	20.99	5.98	70.19
FILE L02140936	PZT-NC	76	60	155	2	0	R1	PRE-ANESTHESIA	0	0	19.77	5.44	66.6	GA
FILE L02140936	PZT-NC	76	60	155	2	0	R2	POST-ANESTHESIA	5	4	27.03	12.66	58.87
FILE L03051433	PZT-CI	77	60	163	2	1	R1	PRE-ANESTHESIA	1	0	16.32	5.93	61.14
FILE L03051433	PZT-CI	77	60	163	2	1	R2	ANESTHESIA	3	3	16.83	5.49	62.22
FILE L03051433	PZT-CI	77	60	163	2	1	R3	POST-ANESTHESIA	0	0	18.7	5.54	62.73
FILE L03061026	PZT-CI	93	70	160	2	1	R1	PRE-ANESTHESIA	3	0	20.47	4.53	65.05
FILE L03061026	PZT-CI	93	70	160	2	1	R2	PRE-ANESTHESIA	3	0	21.51	4.66	66.09
FILE L03061026	PZT-CI	93	70	160	2	1	R3	ANESTHESIA	6	4	23.32	7.92	62.89
FILE L0701011158	PZT-NC	79	80	180	1	0	R1	PRE-ANESTHESIA	6	0	19.12	5.87	69.58
FILE L0701011158	PZT-NC	79	80	180	1	0	R2	PRE-ANESTHESIA	6	0	18.1	4.91	68.64
FILE L0701011158	PZT-NC	79	80	180	1	0	R3	ANESTHESIA	7	4	23.71	9.89	66.88
FILE L03140930	PZT-NC	73	47	160	2	0	R1	PRE-ANESTHESIA	2	0	13.57	2.69	68.4
FILE L03140930	PZT-NC	73	47	160	2	0	R2	PRE-ANESTHESIA	0	0	15.47	3.39	67.09
FILE L03140930	PZT-NC	73	47	160	2	0	R3	ANESTHESIA	0	0	18.93	3.45	62.53
FILE L03140930	PZT-NC	73	47	160	2	0	R4	POST-ANESTHESIA	8	8	24.56	8.22	56.77
FILE L04101053	PZT-NC	83	70	160	2	0	R1	PRE-ANESTHESIA	3	1	18.14	5.15	66.28
FILE L04101053	PZT-NC	83	70	160	2	0	R2	PRE-ANESTHESIA	2	1	17.27	4.23	68
FILE L04101053	PZT-NC	83	70	160	2	0	R3	ANESTHESIA	10	10	20.74	4.59	68.88
FILE L04101053	PZT-NC	83	70	160	2	0	R4	POST-ANESTHESIA	0	0	15.91	3.4	69.02
FILE L0509833	PZT-CI	91	70	170	1	2	R1	PRE-ANESTHESIA	NV	6	17.66	4.34	58.48
FILE L0509833	PZT-CI	91	70	170	1	2	R2	ANESTHESIA	NV	6	17.99	4.35	58.58
FILE L0509833	PZT-CI	91	70	170	1	2	R3	POST-ANESTHESIA	NV	0	13.65	2.71	58.58
FILE L06061244	PZT-CI	85	75	172	2	1	R1	PRE-ANESTHESIA	1	0	22.02	5.94	68.59
FILE L06061244	PZT-CI	85	75	172	2	1	R2	ANESTHESIA	2	0	21.37	4.77	70.01
FILE L06061244	PZT-CI	85	75	172	2	1	R3	POST-ANESTHESIA	0	0	20.74	4.9	69.69
GENDER	1 Male	2 Female
PZT-NC	Normal Cognition Patient
PZT-CI	Cognitive Impairment Patient
GA	General Anesthesia
